# Supplementary material for: Evaluation of Acridine Orange Staining for a Semi-Automated Urinalysis Microscopic Examination at the Point-of-Care
Source: MDPI journal article supplement (doi:10.3390/diagnostics9030122), 2019-09-18
Supplement: s1 [file s1]

# Evaluation of acridine orange staining for a semi-automated urinalysis microscopic examination at the point-of-care

## Supplementary Material

**Table S1.** Object data from Example image 1 acquired using the MATLAB code titled “Automated image analysis of AO-stained urine specimens” in Supplementary Materials.

| Centroid X | Centroid Y | Bounds Left | Bounds Top | Bounds Width | Bounds Height | Area     | Perimeter | RG ratio | Max Intensity | Circularity |
|------------|------------|-------------|------------|--------------|---------------|----------|-----------|----------|---------------|-------------|
| 61.17      | 892.72     | 48.50       | 885.50     | 25.00        | 17.00         | 178.00   | 63.02     | 0.86     | 10.00         | 0.56        |
| 89.60      | 872.39     | 70.50       | 858.50     | 42.00        | 31.00         | 857.00   | 117.18    | 1.44     | 42.00         | 0.78        |
| 101.68     | 954.48     | 90.50       | 946.50     | 24.00        | 18.00         | 160.00   | 59.75     | 1.08     | 9.00          | 0.56        |
| 110.61     | 920.26     | 100.50      | 910.50     | 20.00        | 21.00         | 230.00   | 60.66     | 1.03     | 11.00         | 0.79        |
| 207.58     | 789.47     | 202.50      | 781.50     | 11.00        | 17.00         | 116.00   | 40.14     | 1.35     | 14.00         | 0.90        |
| 276.67     | 469.31     | 270.50      | 463.50     | 13.00        | 12.00         | 101.00   | 34.35     | 0.97     | 14.00         | 1.08        |
| 285.48     | 252.27     | 275.50      | 248.50     | 19.00        | 9.00          | 86.00    | 40.05     | 1.13     | 7.00          | 0.67        |
| 313.14     | 740.48     | 302.50      | 730.50     | 22.00        | 19.00         | 267.00   | 60.19     | 1.17     | 30.00         | 0.93        |
| 444.48     | 72.13      | 434.50      | 67.50      | 21.00        | 10.00         | 134.00   | 46.85     | 1.12     | 13.00         | 0.77        |
| 581.18     | 490.71     | 554.50      | 475.50     | 50.00        | 30.00         | 913.00   | 132.31    | 0.94     | 10.00         | 0.66        |
| 574.44     | 892.69     | 567.50      | 886.50     | 14.00        | 15.00         | 118.00   | 41.92     | 1.94     | 27.00         | 0.84        |
| 683.88     | 523.99     | 675.50      | 512.50     | 16.00        | 23.00         | 212.00   | 58.48     | 0.69     | 20.00         | 0.78        |
| 694.62     | 118.21     | 686.50      | 113.50     | 17.00        | 10.00         | 94.00    | 37.35     | 0.74     | 10.00         | 0.85        |
| 698.95     | 87.21      | 689.50      | 72.50      | 22.00        | 27.00         | 295.00   | 77.84     | 1.76     | 26.00         | 0.61        |
| 724.47     | 322.04     | 716.50      | 312.50     | 17.00        | 20.00         | 184.00   | 52.53     | 0.84     | 8.00          | 0.84        |
| 829.80     | 180.93     | 726.50      | 64.50      | 257.00       | 225.00        | 35430.00 | 903.45    | 0.82     | 165.00        | 0.55        |
| 779.70     | 342.46     | 771.50      | 334.50     | 17.00        | 17.00         | 171.00   | 50.16     | 0.67     | 8.00          | 0.85        |
| 925.21     | 308.61     | 908.50      | 279.50     | 41.00        | 54.00         | 1182.00  | 162.66    | 0.94     | 12.00         | 0.56        |
| 1033.56    | 111.81     | 984.50      | 82.50      | 125.00       | 63.00         | 4713.00  | 344.14    | 0.69     | 40.00         | 0.50        |
